# Supplementary material for: Characterizing antimicrobial resistance and plasmidome diversity in Escherichia coli from imported frozen broiler chicken in the United Arab Emirates
Source: Front Microbiol. 2025 Jun 16;16:1590906. doi: 10.3389/fmicb.2025.1590906 (PMC12206764; doi:10.3389/fmicb.2025.1590906)
Supplement: Supplementary file 2 [file Table_2.xlsx]

## Sheet: AMRFinderPlus
Supplementary File S1 (Table S1.1) Annotation of antimicrobial resistance genes in E. coli isolates using AMRFinderPlus, with ≥90% identity and ≥50% minimum coverage thresholds (actual coverage >90% in most cases).
Basic information					AMR loci (% identity)
Sample name	Uploaded by	Upload date	MLST	SNP Cluster	aac(3)-IVa	aac(3)-VIa	aadA1	aadA2	aph(3'')-Ib	aph(3')-IIa	aph(3')-Ia	aph(4)-Ia	aph(6)-Id	blaCMY-2	blaCTX-M-2	blaCTX-M-55	blaCTX-M-8	blaTEM	blaTEM-1	blaTEM-135	blaTEM-57	ble	cmlA1	cyaA_S352T	dfrA1	dfrA12	dfrA14	dfrA8	floR	fosA3	fosA4	fosA7.5	glpT_E448K	gyrA_D87N	gyrA_S83L	lnu(F)	mph(A)	nfsA_R133S	nfsA_R15C	parC_A56T	parC_S80I	parE_D475E	parE_I355T	parE_S458A	pmrB_E123D	pmrB_Y358N	qacEdelta1	qacL	qnrB19
ECF55_EKDN240023996-1A_227FC3LT4_L5	Ihab Habib	2024-09-19T08:27:56.736Z	10
ECF54_EKDN240023995-1A_227FC3LT4_L5	Ihab Habib	2024-09-19T08:26:36.426Z	4566																	100													99.78	98.97	98.97						99.87			99.68		99.45
ECF53_EKDN240023994-1A_227FC3LT4_L5	Ihab Habib	2024-09-19T08:25:39.678Z	38				100	100											100				100	99.29	100						100		99.12		98.97												100	100
ECF52_EKDN240023993-1A_227FC3LT4_L5	Ihab Habib	2024-09-19T08:24:24.819Z	1564	Ec2												100		100																	99.09
ECF51_EKDN240023992-1A_2275YTLT4_L6	Ihab Habib	2024-09-19T08:23:26.951Z	69					100											100					99.29				100	99.75				98.89			98.83
ECF50_EKDN240023991-1A_227FC3LT4_L7	Ihab Habib	2024-09-19T08:22:24.285Z	770				100												100					99.17	100								99.12									99.52					100		100
ECF49_EKDN240023990-1A_227FC3LT4_L7	Ihab Habib	2024-09-19T08:21:34.443Z	1564				100	100										100					100								100																	100
ECF48_EKDN240023989-1A_227FC3LT4_L7	Ihab Habib	2024-09-19T08:20:27.852Z	115	Ec3			100			100							100					96.2		99.29									98.89	98.86	98.86			97.5			99.73
ECF47_EKDN240023988-1A_227FC3LT4_L7	Ihab Habib	2024-09-19T08:19:42.628Z	101	Ec1			100	100													100		100								100		99.78													99.45		100
ECF46_EKDN240023987-1A_227FC3LT4_L7	Ihab Habib	2024-09-19T08:18:52.237Z	1564														100																		99.09
ECF45_EKDN240023986-1A_227FC3LT4_L7	Ihab Habib	2024-09-19T08:17:59.828Z	115	Ec3			100			100							100					96.2		99.29									98.89	98.86	98.86			97.5			99.73
ECF44_EKDN240023985-1A_227FC3LT4_L7	Ihab Habib	2024-09-19T08:17:10.995Z	4243			100	100	100													100		100	99.29							100		98.89														100	100
ECF43_EKDN240023984-1A_227FC3LT4_L7	Ihab Habib	2024-09-19T08:16:15.363Z	4110																														99.78									99.52			98.9
ECF42_EKDN240023983-1A_227FC3LT4_L7	Ihab Habib	2024-09-19T08:15:16.193Z	155																100						100								99.78													99.45
ECF41_EKDN240023982-1A_227FC3LT4_L7	Ihab Habib	2024-09-19T08:14:21.199Z	1101																														99.34		99.09											99.45
ECF40_EKDN240023981-1A_227FC3LT4_L7	Ihab Habib	2024-09-19T08:13:17.861Z	1720				100	100			100							100					100				100				100		99.78													99.45		100
ECF39_EKDN240023980-1A_227FC3LT4_L7	Ihab Habib	2024-09-19T07:29:04.888Z	48				100	100													100		100								100																	100
ECF38_EKDN240023979-1A_227FCCLT4_L2	Ihab Habib	2024-09-19T07:27:24.725Z	69				100	100			100			100					100				100	99.29		99.39					100		98.89	98.86	98.86	100	100				99.87			99.68				100
ECF37_EKDN240023978-1A_227FC3LT4_L7	Ihab Habib	2024-09-19T07:26:22.901Z	155																100														96.46	98.97	98.97						99.87					99.45
ECF36_EKDN240023977-1A_22KKTYLT3_L5	Ihab Habib	2024-09-19T07:25:52.423Z	1011								100																						99.12
ECF35_EKDN240023976-1A_227FC3LT4_L7	Ihab Habib	2024-09-19T07:24:46.874Z	1564	Ec2												100		100																	99.09
ECF34_EKDN240023975-1A_227FC3LT4_L7	Ihab Habib	2024-09-19T07:23:57.320Z	4753	Ec4																													99.12	98.86	98.86				97.92		99.87
ECF32_EKDN240023973-1A_227FC3LT4_L7	Ihab Habib	2024-09-19T07:22:15.056Z	58			98.66	100								100																		99.78													99.45	100
ECF31_EKDN240023972-1A_227FC3LT4_L7	Ihab Habib	2024-09-19T07:21:26.077Z	2562			100	100	100							100								100	99.06		100							99.12														100	100	100
ECF30_EKDN240023971-1A_227FC3LT4_L7	Ihab Habib	2024-09-19T07:20:34.360Z	602																100													100	99.56	98.97	98.97						99.87					99.45
ECF29_EKDN240023970-1A_227FC3LT4_L7	Ihab Habib	2024-09-19T07:19:44.282Z	101	Ec1			100	100													100		100								100		99.78													99.45		100
ECF27_EKDN240023968-1A_227FC3LT4_L7	Ihab Habib	2024-09-19T07:17:11.598Z	191													100	100	100												100			99.78													99.45
ECF26_EKDN240023967-1A_227FC3LT4_L7	Ihab Habib	2024-09-19T07:16:04.799Z	4753	Ec4																													99.12	98.86	98.86				97.92		99.87
ECF25_EKDN240023966-1A_227FC3LT4_L7	Ihab Habib	2024-09-19T07:15:07.348Z	58						100				100			100		100												100			99.78		98.97						99.87					99.45
ECF24_EKDN240023965-1A_227FC3LT4_L7	Ihab Habib	2024-09-19T07:14:01.503Z	115																					99.29									99.12
ECF23_EKDN240023964-1A_227FC3LT4_L7	Ihab Habib	2024-09-19T07:12:55.815Z	1266					100																									99.12													99.17	100
ECF22_EKDN240023963-1A_227FC3LT4_L7	Ihab Habib	2024-09-19T07:12:04.180Z	8132		100		100		100		100	100	100			100		100							100					100			99.78		98.97					99.73						99.45	100
ECF21_EKDN240023962-1A_227FCCLT4_L8	Ihab Habib	2024-09-19T07:04:38.076Z	1158			100	100								100									99.29									98.67	98.86	98.86						99.73		99.37				100
[truncated: 159 more columns]

## Sheet: E. coli SNP dists
Supplementary File S1 (Table S1.2). Pairwise single nucleotide polymorphism (SNP) distances among E. coli isolates recovered from imported frozen chicken carcasses sampled at UAE retail markets.
	ECF37_EKDN240023978-1A_227FC3LT4_L7	ECF51_EKDN240023992-1A_2275YTLT4_L6	ECF29_EKDN240023970-1A_227FC3LT4_L7	ECF53_EKDN240023994-1A_227FC3LT4_L5	ECF52_EKDN240023993-1A_227FC3LT4_L5	ECF21_EKDN240023962-1A_227FCCLT4_L8	ECF46_EKDN240023987-1A_227FC3LT4_L7	ECF23_EKDN240023964-1A_227FC3LT4_L7	ECF25_EKDN240023966-1A_227FC3LT4_L7	ECF54_EKDN240023995-1A_227FC3LT4_L5	ECF40_EKDN240023981-1A_227FC3LT4_L7	ECF39_EKDN240023980-1A_227FC3LT4_L7	ECF38_EKDN240023979-1A_227FCCLT4_L2	ECF41_EKDN240023982-1A_227FC3LT4_L7	ECF35_EKDN240023976-1A_227FC3LT4_L7	ECF45_EKDN240023986-1A_227FC3LT4_L7	ECF48_EKDN240023989-1A_227FC3LT4_L7	ECF50_EKDN240023991-1A_227FC3LT4_L7	ECF22_EKDN240023963-1A_227FC3LT4_L7	ECF43_EKDN240023984-1A_227FC3LT4_L7	ECF31_EKDN240023972-1A_227FC3LT4_L7	ECF49_EKDN240023990-1A_227FC3LT4_L7	ECF27_EKDN240023968-1A_227FC3LT4_L7	ECF47_EKDN240023988-1A_227FC3LT4_L7	ECF55_EKDN240023996-1A_227FC3LT4_L5	ECF26_EKDN240023967-1A_227FC3LT4_L7	ECF44_EKDN240023985-1A_227FC3LT4_L7	ECF32_EKDN240023973-1A_227FC3LT4_L7	ECF42_EKDN240023983-1A_227FC3LT4_L7	ECF30_EKDN240023971-1A_227FC3LT4_L7	ECF24_EKDN240023965-1A_227FC3LT4_L7	ECF34_EKDN240023975-1A_227FC3LT4_L7	ECF36_EKDN240023977-1A_22KKTYLT3_L5
ECF37_EKDN240023978-1A_227FC3LT4_L7	0	41455	13832	41933	26010	42593	25996	32839	3533	15190	14043	26502	41551	14288	26016	42542	42567	52022	26302	44390	52998	26120	14532	13842	26993	32964	42841	3624	2991	13843	42848	32877	29894
ECF51_EKDN240023992-1A_2275YTLT4_L6	41455	0	41594	27009	40676	22187	40638	41784	41156	41695	41459	41299	3108	41574	40683	27203	27215	47699	41605	42686	48389	40761	41938	41614	41779	41711	25941	41653	41663	41998	27220	41615	41518
ECF29_EKDN240023970-1A_227FC3LT4_L7	13832	41594	0	42284	25706	42607	25733	33010	13834	14772	15025	26266	41664	14102	25710	42777	42812	51919	26157	44888	53296	25804	13549	11	27301	33192	43010	13509	13332	11387	43116	33092	30322
ECF53_EKDN240023994-1A_227FC3LT4_L5	41933	27009	42284	0	41211	27176	41193	41532	41674	42037	41695	41534	27052	41884	41178	16778	16799	47829	42207	42495	48324	41310	42251	42296	42216	41538	25975	42252	42224	42503	16532	41428	41523
ECF52_EKDN240023993-1A_227FC3LT4_L5	26010	40676	25706	41211	0	41731	64	32186	25870	25694	25237	10661	40803	25625	9	41637	41665	49677	14405	43169	50719	306	25624	25716	10051	31618	41917	26062	26120	25989	41889	31613	31236
ECF21_EKDN240023962-1A_227FCCLT4_L8	42593	22187	42607	27176	41731	0	41743	42737	42386	42765	42509	42501	22628	42763	41698	27958	27974	47573	42598	43001	48519	41795	43133	42626	42925	42640	25501	42829	42813	43123	27863	42551	42389
ECF46_EKDN240023987-1A_227FC3LT4_L7	25996	40638	25733	41193	64	41743	0	32177	25871	25710	25238	10597	40797	25639	65	41587	41616	49690	14389	43187	50714	270	25633	25744	10030	31568	41937	26046	26109	25991	41842	31560	31214
ECF23_EKDN240023964-1A_227FC3LT4_L7	32839	41784	33010	41532	32186	42737	32177	0	32944	32774	32798	32706	41874	33033	32180	42469	42504	52389	32572	44311	53277	32255	33263	33024	33240	22773	42906	33131	32945	32861	42684	22736	25181
ECF25_EKDN240023966-1A_227FC3LT4_L7	3533	41156	13834	41674	25870	42386	25871	32944	0	15260	14490	26147	41263	14358	25872	42271	42298	51800	26337	43957	52697	25950	14725	13844	27202	33483	42564	2790	4454	13960	42587	33401	30018
ECF54_EKDN240023995-1A_227FC3LT4_L5	15190	41695	14772	42037	25694	42765	25710	32774	15260	0	16410	26437	41773	16094	25697	42685	42712	51942	26578	44927	53195	25735	15276	14769	27275	33032	43080	15091	15152	15317	42982	32942	30127
ECF40_EKDN240023981-1A_227FC3LT4_L7	14043	41459	15025	41695	25237	42509	25238	32798	14490	16410	0	26086	41418	14725	25206	42561	42579	51386	26011	44537	52840	25351	15415	15026	26714	32975	42533	14047	13984	15415	42861	32886	30413
ECF39_EKDN240023980-1A_227FC3LT4_L7	26502	41299	26266	41534	10661	42501	10597	32706	26147	26437	26086	0	41449	26283	10625	42429	42462	50501	13902	44172	51405	10767	26253	26276	9771	32517	42598	26748	26762	26776	42661	32521	31805
ECF38_EKDN240023979-1A_227FCCLT4_L2	41551	3108	41664	27052	40803	22628	40797	41874	41263	41773	41418	41449	0	41651	40811	27494	27512	47743	41651	42378	48529	40851	42037	41679	41899	41665	26125	41752	41800	42132	27390	41564	41575
ECF41_EKDN240023982-1A_227FC3LT4_L7	14288	41574	14102	41884	25625	42763	25639	33033	14358	16094	14725	26283	41651	0	25625	42578	42609	51998	25983	44566	53131	25706	14382	14104	27048	33136	42800	14162	14369	14002	42949	33046	30255
ECF35_EKDN240023976-1A_227FC3LT4_L7	26016	40683	25710	41178	9	41698	65	32180	25872	25697	25206	10625	40811	25625	0	41636	41666	49682	14398	43174	50724	307	25627	25721	10042	31614	41896	26067	26117	25993	41856	31611	31234
ECF45_EKDN240023986-1A_227FC3LT4_L7	42542	27203	42777	16778	41637	27958	41587	42469	42271	42685	42561	42429	27494	42578	41636	0	0	48304	42610	43120	49119	41689	42882	42798	42961	42497	26923	42840	42697	43116	1481	42393	42050
ECF48_EKDN240023989-1A_227FC3LT4_L7	42567	27215	42812	16799	41665	27974	41616	42504	42298	42712	42579	42462	27512	42609	41666	0	0	48305	42639	43144	49144	41721	42916	42832	42993	42527	26929	42862	42722	43152	1481	42422	42081
ECF50_EKDN240023991-1A_227FC3LT4_L7	52022	47699	51919	47829	49677	47573	49690	52389	51800	51942	51386	50501	47743	51998	49682	48304	48305	0	51107	49865	24081	49765	52108	51930	51239	52477	48194	52233	51984	52378	48581	52334	52149
ECF22_EKDN240023963-1A_227FC3LT4_L7	26302	41605	26157	42207	14405	42598	14389	32572	26337	26578	26011	13902	41651	25983	14398	42610	42639	51107	0	44028	52159	14519	26237	26167	14182	32130	43013	25950	26534	26420	42881	32060	31429
ECF43_EKDN240023984-1A_227FC3LT4_L7	44390	42686	44888	42495	43169	43001	43187	44311	43957	44927	44537	44172	42378	44566	43174	43120	43144	49865	44028	0	51029	43283	44943	44907	44584	44318	43158	44740	44674	45103	43390	44206	43906
ECF31_EKDN240023972-1A_227FC3LT4_L7	52998	48389	53296	48324	50719	48519	50714	53277	52697	53195	52840	51405	48529	53131	50724	49119	49144	24081	52159	51029	0	50808	53409	53305	52098	53409	48587	53358	53292	53557	49164	53258	53065
ECF49_EKDN240023990-1A_227FC3LT4_L7	26120	40761	25804	41310	306	41795	270	32255	25950	25735	25351	10767	40851	25706	307	41689	41721	49765	14519	43283	50808	0	25679	25812	10148	31581	41996	26165	26210	26079	41950	31573	31320
ECF27_EKDN240023968-1A_227FC3LT4_L7	14532	41938	13549	42251	25624	43133	25633	33263	14725	15276	15415	26253	42037	14382	25627	42882	42916	52108	26237	44943	53409	25679	0	13557	27019	33513	43253	14366	14382	13509	43216	33408	30363
ECF47_EKDN240023988-1A_227FC3LT4_L7	13842	41614	11	42296	25716	42626	25744	33024	13844	14769	15026	26276	41679	14104	25721	42798	42832	51930	26167	44907	53305	25812	13557	0	27314	33206	43030	13519	13339	11398	43135	33106	30334
ECF55_EKDN240023996-1A_227FC3LT4_L5	26993	41779	27301	42216	10051	42925	10030	33240	27202	27275	26714	9771	41899	27048	10042	42961	42993	51239	14182	44584	52098	10148	27019	27314	0	32870	43311	27321	27494	27448	43324	32794	32135
ECF26_EKDN240023967-1A_227FC3LT4_L7	32964	41711	33192	41538	31618	42640	31568	22773	33483	33032	32975	32517	41665	33136	31614	42497	42527	52477	32130	44318	53409	31581	33513	33206	32870	0	42973	33284	33224	33565	42594	2	26127
ECF44_EKDN240023985-1A_227FC3LT4_L7	42841	25941	43010	25975	41917	25501	41937	42906	42564	43080	42533	42598	26125	42800	41896	26923	26929	48194	43013	43158	48587	41996	43253	43030	43311	42973	0	43037	43088	43282	26748	42860	42727
ECF32_EKDN240023973-1A_227FC3LT4_L7	3624	41653	13509	42252	26062	42829	26046	33131	2790	15091	14047	26748	41752	14162	26067	42840	42862	52233	25950	44740	53358	26165	14366	13519	27321	33284	43037	0	3985	13575	43085	33206	30266
ECF42_EKDN240023983-1A_227FC3LT4_L7	2991	41663	13332	42224	26120	42813	26109	32945	4454	15152	13984	26762	41800	14369	26117	42697	42722	51984	26534	44674	53292	26210	14382	13339	27494	33224	43088	3985	0	13691	43021	33141	30083
ECF30_EKDN240023971-1A_227FC3LT4_L7	13843	41998	11387	42503	25989	43123	25991	32861	13960	15317	15415	26776	42132	14002	25993	43116	43152	52378	26420	45103	53557	26079	13509	11398	27448	33565	43282	13575	13691	0	43523	33474	30093
ECF24_EKDN240023965-1A_227FC3LT4_L7	42848	27220	43116	16532	41889	27863	41842	42684	42587	42982	42861	42661	27390	42949	41856	1481	1481	48581	42881	43390	49164	41950	43216	43135	43324	42594	26748	43085	43021	43523	0	42491	42353
ECF34_EKDN240023975-1A_227FC3LT4_L7	32877	41615	33092	41428	31613	42551	31560	22736	33401	32942	32886	32521	41564	33046	31611	42393	42422	52334	32060	44206	53258	31573	33408	33106	32794	2	42860	33206	33141	33474	42491	0	26098
ECF36_EKDN240023977-1A_22KKTYLT3_L5	29894	41518	30322	41523	31236	42389	31214	25181	30018	30127	30413	31805	41575	30255	31234	42050	42081	52149	31429	43906	53065	31320	30363	30334	32135	26127	42727	30266	30083	30093	42353	26098	0
