# Supplementary material for: Characterizing antimicrobial resistance and plasmidome diversity in Escherichia coli from imported frozen broiler chicken in the United Arab Emirates
Source: Front Microbiol. 2025 Jun 16;16:1590906. doi: 10.3389/fmicb.2025.1590906 (PMC12206764; doi:10.3389/fmicb.2025.1590906)
Supplement: Supplementary file 3 [file Table_3.xlsx]

## Sheet: Sheet2
Supplementary File S2: Assembly quality metrics of 33 whole-genome sequenced E. coli from retail imported frozen chicken in the UAE
Isolates	Genome assembly statistics
ECF55	Total length	4983230
	# Contigs	87
	Largest contig	394880
	GC%	50.46
	N50	146599
	N75	93170
	L50	10
	L75	21
	Genome fraction	93.363
	Misassembled contigs length	2929853
	Mismatches per 100 Kb	228.86
	Duplication ratio	1.003
ECF54	Total length	5317134
	# Contigs	117
	Largest contig	592807
	GC%	50.72
	N50	187979
	N75	111759
	L50	8
	L75	17
	Genome fraction	90.277
	Misassembled contigs length	4282955
	Mismatches per 100 Kb	1266.53
	Duplication ratio	1.002
ECF53	Total length	5483362
	# Contigs	131
	Largest contig	399194
	GC%	50.44
	N50	150717
	N75	79048
	L50	13
	L75	25
	Genome fraction	87.906
	Misassembled contigs length	4377935
	Mismatches per 100 Kb	2204.74
	Duplication ratio	1.006
ECF52	Total length	5200142
	# Contigs	168
	Largest contig	254213
	GC%	50.7
	N50	99063
	N75	46033
	L50	19
	L75	38
	Genome fraction	89.656
	Misassembled contigs length	2718891
	Mismatches per 100 Kb	461.54
	Duplication ratio	1.006
ECF51	Total length	5252195
	# Contigs	80
	Largest contig	713709
	GC%	50.47
	N50	342740
	N75	203370
	L50	6
	L75	11
	Genome fraction	88.268
	Misassembled contigs length	4652354
	Mismatches per 100 Kb	2149.64
	Duplication ratio	1.004
ECF50	Total length	5904499
	# Contigs	261
	Largest contig	393315
	GC%	50.32
	N50	156129
	N75	66875
	L50	13
	L75	26
	Genome fraction	82.773
	Misassembled contigs length	4649162
	Mismatches per 100 Kb	3241.32
	Duplication ratio	1.004
ECF49	Total length	5219999
	# Contigs	164
	Largest contig	202054
	GC%	50.7
	N50	86696
	N75	43239
	L50	22
	L75	43
	Genome fraction	89.637
	Misassembled contigs length	2380284
	Mismatches per 100 Kb	461.69
	Duplication ratio	1.006
ECF48	Total length	5878969
	# Contigs	314
	Largest contig	218679
	GC%	50.34
	N50	88325
	N75	42802
	L50	22
	L75	46
	Genome fraction	88.184
	Misassembled contigs length	4110263
	Mismatches per 100 Kb	2237.2
	Duplication ratio	1.006
ECF47	Total length	5155358
	# Contigs	47
	Largest contig	1472143
	GC%	50.59
	N50	327295
	N75	183779
	L50	4
	L75	10
	Genome fraction	90.476
	Misassembled contigs length	4677458
	Mismatches per 100 Kb	1273.11
	Duplication ratio	1.004
ECF46	Total length	5164361
	# Contigs	164
	Largest contig	203526
	GC%	50.76
	N50	102199
	N75	44187
	L50	19
	L75	39
	Genome fraction	89.54
	Misassembled contigs length	2877536
	Mismatches per 100 Kb	454.46
	Duplication ratio	1.005
ECF45	Total length	5887022
	# Contigs	306
	Largest contig	298503
	GC%	50.35
	N50	89076
	N75	43127
	L50	21
	L75	45
	Genome fraction	88.194
	Misassembled contigs length	4100887
	Mismatches per 100 Kb	2238.03
	Duplication ratio	1.006
ECF44	Total length	5642990
	# Contigs	281
	Largest contig	271483
	GC%	50.57
	N50	90000
	N75	45106
	L50	20
	L75	42
	Genome fraction	87.404
	Misassembled contigs length	3596013
	Mismatches per 100 Kb	2276.94
	Duplication ratio	1.004
ECF43	Total length	5042683
	# Contigs	55
	Largest contig	837451
	GC%	50.5
	N50	469683
	N75	220030
	L50	4
	L75	9
	Genome fraction	81.67
	Misassembled contigs length	4392106
	Mismatches per 100 Kb	2561.69
	Duplication ratio	1.002
ECF42	Total length	5039946
	# Contigs	80
	Largest contig	482164
	GC%	50.62
	N50	242016
	N75	111922
	L50	8
	L75	15
	Genome fraction	90.678
	Misassembled contigs length	4415215
	Mismatches per 100 Kb	1266.89
	Duplication ratio	1.003
ECF41	Total length	5243854
	# Contigs	97
	Largest contig	390492
	GC%	50.55
	N50	151064
	N75	88674
	L50	11
	L75	22
	Genome fraction	90.045
	Misassembled contigs length	4119255
	Mismatches per 100 Kb	1265.25
	Duplication ratio	1.004
ECF40	Total length	4991954
	# Contigs	153
	Largest contig	315431
	GC%	50.46
	N50	104962
	N75	57616
	L50	16
	L75	31
	Genome fraction	89.925
	Misassembled contigs length	3891299
	Mismatches per 100 Kb	1205.13
	Duplication ratio	1.004
ECF39	Total length	5129115
	# Contigs	126
	Largest contig	267658
	GC%	50.6
	N50	94095
	N75	72701
	L50	17
	L75	32
	Genome fraction	91.446
	Misassembled contigs length	2891503
	Mismatches per 100 Kb	467.32
	Duplication ratio	1.005
ECF38	Total length	5853933
	# Contigs	242
	Largest contig	403235
	GC%	50.5
	N50	112967
	N75	59052
	L50	12
	L75	29
	Genome fraction	88.577
	Misassembled contigs length	4284982
	Mismatches per 100 Kb	2163.48
	Duplication ratio	1.007
ECF37	Total length	4980049
	# Contigs	64
	Largest contig	662222
	GC%	50.69
	N50	185925
	N75	96825
	L50	9
	L75	19
	Genome fraction	90.172
	Misassembled contigs length	4425366
	Mismatches per 100 Kb	1275.6
	Duplication ratio	1.005
ECF36	Total length	5010582
	# Contigs	43
	Largest contig	629569
	GC%	50.6
	N50	312649
	N75	250613
	L50	6
	L75	10
	Genome fraction	89.352
	Misassembled contigs length	4338651
	Mismatches per 100 Kb	1563.37
	Duplication ratio	1.003
ECF35	Total length	5229606
	# Contigs	167
	Largest contig	254124
	GC%	50.68
	N50	97038
	N75	46033
	L50	20
	L75	40
	Genome fraction	89.674
	Misassembled contigs length	2871466
	Mismatches per 100 Kb	460.46
	Duplication ratio	1.006
ECF34	Total length	5357162
	# Contigs	102
	Largest contig	410032
	GC%	50.6
	N50	136204
	N75	69750
	L50	11
	L75	26
	Genome fraction	90.283
	Misassembled contigs length	4184503
	Mismatches per 100 Kb	1542.78
	Duplication ratio	1.007
ECF32	Total length	5003753
	# Contigs	60
	Largest contig	655716
	GC%	50.61
	N50	293777
	N75	123312
	L50	6
	L75	13
	Genome fraction	90.578
	Misassembled contigs length	4369321
	Mismatches per 100 Kb	1267.86
	Duplication ratio	1.003
ECF31	Total length	5178578
	# Contigs	67
	Largest contig	646614
	GC%	50.15
	N50	325074
	N75	137998
	L50	6
	L75	12
	Genome fraction	82.651
	Misassembled contigs length	4701474
	Mismatches per 100 Kb	3381.86
	Duplication ratio	1.002
ECF30	Total length	5202273
	# Contigs	108
	Largest contig	409179
	GC%	50.59
	N50	175807
	N75	87811
	L50	11
	L75	22
	Genome fraction	91.039
	Misassembled contigs length	4298190
	Mismatches per 100 Kb	1278.94
	Duplication ratio	1.008
ECF29	Total length	5156620
	# Contigs	53
	Largest contig	1048096
	GC%	50.59
	N50	326944
	N75	151118
	L50	5
	L75	10
	Genome fraction	90.441
	Misassembled contigs length	4650148
	Mismatches per 100 Kb	1272.77
	Duplication ratio	1.004
ECF27	Total length	4987388
	# Contigs	89
	Largest contig	694355
	GC%	50.62
	N50	286797
	N75	135426
	L50	6
	L75	13
	Genome fraction	90.811
	Misassembled contigs length	3879065
	Mismatches per 100 Kb	1246.51
	Duplication ratio	1.003
ECF26	Total length	5425538
	# Contigs	106
	Largest contig	409936
	GC%	50.51
	N50	112796
	N75	69750
	L50	12
	L75	27
	Genome fraction	90.473
	Misassembled contigs length	4186306
	Mismatches per 100 Kb	1543.1
	Duplication ratio	1.007
ECF25	Total length	5134524
	# Contigs	122
	Largest contig	311698
	GC%	50.59
	N50	118979
	N75	75451
	L50	14
	L75	27
	Genome fraction	89.455
	Misassembled contigs length	3733692
	Mismatches per 100 Kb	1254.81
	Duplication ratio	1.003
ECF24	Total length	5703093
	# Contigs	237
	Largest contig	313996
	GC%	50.5
	N50	112429
	N75	64832
	L50	16
	L75	31
	Genome fraction	88.679
	Misassembled contigs length	4354014
	Mismatches per 100 Kb	2239.49
	Duplication ratio	1.006
ECF23	Total length	5457681
	# Contigs	122
	Largest contig	619332
	GC%	50.35
	N50	207817
	N75	87164
	L50	9
	L75	19
	Genome fraction	89.104
	Misassembled contigs length	4721385
	Mismatches per 100 Kb	1604.77
	Duplication ratio	1.005
ECF22	Total length	5182150
	# Contigs	185
	Largest contig	224196
	GC%	50.61
	N50	76263
	N75	36898
	L50	20
	L75	43
	Genome fraction	90.988
	Misassembled contigs length	2513777
	Mismatches per 100 Kb	621.78
	Duplication ratio	1.005
ECF21	Total length	5976560
	# Contigs	258
	Largest contig	352563
	GC%	50.43
	N50	154354
	N75	61838
	L50	13
	L75	28
	Genome fraction	87.869
	Misassembled contigs length	4457642
	Mismatches per 100 Kb	2250.13
	Duplication ratio	1.004
