# Supplementary material for: Characterizing antimicrobial resistance and plasmidome diversity in Escherichia coli from imported frozen broiler chicken in the United Arab Emirates
Source: Front Microbiol. 2025 Jun 16;16:1590906. doi: 10.3389/fmicb.2025.1590906 (PMC12206764; doi:10.3389/fmicb.2025.1590906)
Supplement: Supplementary file 4 [file Table_4.xlsx]

## Sheet: Sheet1
Supplementary File S3 (Table S3). Plasmid details (MOB-suite output) of 197 plasmids predicted in 33 E. coli isolates recovered from imported frozen chicken carcasses sampled at UAE retail markets.
List	isolate	Size (bp)	MOB Cluster	AMR genes	Replicon types	Relaxase types	mpf	oriT	Mash nearest neighbor	Mash neighbor distance	Mobility
1	ECF21	96885	AA281	-	Col(MG828), IncK2/Z	MOBP	MPF_I	MOBP	MG825371	0.026819	conjugative
2	ECF21	149907	AA474	6	IncI-gamma/K1	MOBP	MPF_I	MOBP	NC_019123	0.0117112	conjugative
3	ECF21	64424	AA314	-	IncFIA, IncFIC	MOBF	MPF_F	MOBF	CP012928	0.0357395	conjugative
5	ECF21	9135	AC510	-	rep_cluster_2350	MOBP		MOBP	CP000972	0.000931334	mobilizable
6	ECF21	6887	AA576	-	rep_cluster_2150	MOBQ		MOBQ	NC_022585	0.017359	mobilizable
7	ECF21	4210	AA672	-	rep_cluster_2350	MOBF		MOB_unknown	CP031925	0.00960897	mobilizable
8	ECF21	2646	AE763	-				MOBP	CP039589	0.0213613	mobilizable
10	ECF22	188529	AA859	2	IncC	MOBH	MPF_F	MOBH	NC_021815	0.00369655	conjugative
11	ECF22	172818	AA738	4	rep_cluster_1088	MOBH, MOBP	MPF_F	MOBH, MOBP	CP027411	0.016782	conjugative
13	ECF22	91080	AA327	3	IncFIA, IncN	MOBF, MOBQ	MPF_F	MOBP	MG197494	0.00631659	conjugative
16	ECF22	7444	AA144	-	rep_cluster_2358	MOBP		MOBP	FN822749	0.022205	mobilizable
18	ECF23	32732	AA619	-	IncX4	MOBP	MPF_T	-	CP041105	0.00216198	conjugative
19	ECF23	84647	AA315	-	IncFIA, IncFIC, rep_cluster_2244	MOBF	MPF_F	MOBF	CP032810	0.0232268	conjugative
21	ECF23	3393	AD482	-	rep_cluster_2350			MOBF, MOBP, MOB_unknown	CP033763	0.00550978	mobilizable
23	ECF24	53565	AA314	-	IncFIA, IncFIC	MOBF	MPF_F	MOBF	CP012928	0.0319897	conjugative
25	ECF24	154730	AA281	-	IncK2/Z	MOBP	MPF_I	MOBP	CP029742	0.022205	conjugative
27	ECF24	7344	AA576	-	rep_cluster_2150	MOBQ		MOBQ	KY348421	0.0293293	mobilizable
28	ECF24	5700	AA579	-	rep_cluster_1778	MOBQ		MOBQ	KT693145	0.0461689	mobilizable
29	ECF25	190159	AA327	3	IncFIA, IncHI1B, IncN	MOBF, MOBQ	MPF_F	MOBP	MK419152	0.0172424	conjugative
30	ECF25	131401	AA176	3	IncFIB, IncFIC, rep_cluster_2244	MOBF	MPF_F	MOBF	CP001122	0.00705245	conjugative
31	ECF25	10133	AB444	-	rep_cluster_2350	MOBP		MOBP	AP019767	0.0146626	mobilizable
33	ECF26	61200	AA372	-	IncI2	MOBP	MPF_T	-	CP009581	0.0126347	conjugative
34	ECF26	138031	AA176	-	IncFIB, IncFIC, rep_cluster_2244	MOBF	MPF_F	-	NC_009837	0.00834599	conjugative
36	ECF26	1676	AB686	-	Col(MG828)			MOBP	CP027128	0.00136596	mobilizable
37	ECF27	87087	AA474	1	IncI-gamma/K1	MOBP	MPF_I	MOBP	AP017892	0.00208065	conjugative
38	ECF27	184126	AA176	-	IncFIB, IncFIC, rep_cluster_2244	MOBF	MPF_F	MOBF	NC_009837	0.00502299	conjugative
39	ECF27	54731	AC038	3	IncFIA, IncFII, IncN	MOBF, MOBQ		-	MG197493	0.0100207	mobilizable
40	ECF29	108112	AA176	-	IncFIA, IncFIC, IncFIB	MOBF, MOBP	MPF_F	MOBF	CP000836	0.00442466	conjugative
41	ECF29	124429	AA474	7	IncI-gamma/K1	MOBP	MPF_I	MOBP	CP012929	0.00869309	conjugative
42	ECF30	102656	AA474	-	IncI-gamma/K1	MOBP	MPF_I	MOBP	CP016533	0.011621	conjugative
46	ECF30	4767	AA524	-	ColRNAI_rep_cluster_1987	MOBP		MOB_unknown	CP032884	0.00378594	mobilizable
47	ECF30	1660	AB685	-	Col(MG828)			MOBP, MOB_unknown	KM107846	0.000830728	mobilizable
49	ECF31	99789	AA473	-	IncI-gamma/K1	MOBP	MPF_I	MOBP	CP022734	0.00282712	conjugative
50	ECF31	132552	AA175	4	IncFIA, IncFIB	MOBF	MPF_F	MOBF	CP041301	0.00611156	conjugative
51	ECF31	34819	AA619	-	IncX4	MOBP	MPF_T	-	CP041105	0.00357808	conjugative
52	ECF31	31429	AB233	-	IncX1, IncX3	MOBP	MPF_T	MOBP	LT985262	0.006248	conjugative
54	ECF31	3100	AB042	1	rep_cluster_2335			MOBP	KX257263	0.000143503	mobilizable
55	ECF31	2368	AB240	-	ColpVC			MOBP	CP016582	0.0250805	mobilizable
58	ECF32	6173	AB062	-	rep_cluster_2350	MOBP		MOBP	CP039863	0.0138485	mobilizable
59	ECF34	131832	AA176	-	IncFIB, IncFIC, rep_cluster_2244	MOBF	MPF_F	-	NC_009837	0.00900687	conjugative
61	ECF35	175052	AA859	2	IncC	MOBH	MPF_F	-	CP031362	0.00334352	conjugative
62	ECF35	82675	AA474	-	IncI-gamma/K1	MOBP	MPF_I	MOBP	AP017892	0.00393593	conjugative
63	ECF35	153317	AA178	-	IncFIB, IncFIC, rep_cluster_2244, rep_cluster_2313	MOBF	MPF_F	MOBF	CP043952	0.006248	conjugative
64	ECF35	36607	AB233	-	IncX1, IncX3	MOBP	MPF_T	MOBP	CP025864	0.0239063	conjugative
65	ECF35	71258	AA327	2	IncFIA, IncN	MOBF, MOBQ	MPF_F	MOBP	CP035314	0.00631659	conjugative
67	ECF36	64783	AA326	-	IncFIA	MOBF	MPF_F	MOBF	AY214164	0.0242917	conjugative
68	ECF36	48855	AC305	3	IncX1	MOBP	MPF_T	-	CP037995	0.0115761	conjugative
70	ECF37	104085	AA474	-	IncI-gamma/K1	MOBP	MPF_I	MOBP	KU932033	0.0123068	conjugative
74	ECF38	111975	AA281	4	IncK2/Z	MOBP	MPF_I	MOBP	KR905384	0.00977265	conjugative
75	ECF38	27033	AA174	-	IncFIB, IncFII	MOBF	MPF_T	-	CP023361	0.043179	conjugative
78	ECF38	9349	AC510	-	rep_cluster_2350	MOBP		MOBP	CP000972	0.00115999	mobilizable
81	ECF38	2368	AB243	-	Col(MP18)			MOBP	CP032886	0.0381928	mobilizable
83	ECF39	121584	AA474	7	IncI-gamma/K1	MOBP	MPF_I	MOBP	CP012929	0.00819369	conjugative
84	ECF39	79918	AA319	-	IncFIC, rep_cluster_2244	MOBF	MPF_F	MOBF	KJ170699	0.0144049	conjugative
87	ECF39	9021	AC510	-	rep_cluster_2350	MOBP		MOBP	CP032881	0.00194597	mobilizable
88	ECF39	4015	AA974	-	Col156	MOBQ		-	CP016386	0.00058191	mobilizable
89	ECF39	2368	AB240	-	ColpVC			MOBP	CP016582	0.0250805	mobilizable
90	ECF39	1663	AB685	-	Col(MG828)			MOBP, MOB_unknown	CP011143	0.0114419	mobilizable
92	ECF40	90721	AA474	-	IncI-gamma/K1	MOBP	MPF_I	MOBP	CP012929	0.00541137	conjugative
93	ECF40	55551	AC305	8	IncX1	MOBP	MPF_T	-	MK731977	0.0122141	conjugative
94	ECF40	49716	AA315	-	IncFIA, IncFII		MPF_F	MOBF	MK092064	0.0501998	mobilizable
96	ECF40	55870	AA374	-	IncHI1B	MOBH		-	CP030285	0.0191181	mobilizable
98	ECF40	5380	AB445	-	rep_cluster_2350	MOBP		MOBP	NC_003457	0.00139189	mobilizable
99	ECF40	4546	AG471	-	rep_cluster_2350	MOBF		MOB_unknown	HQ848325	0.0309745	mobilizable
100	ECF40	3392	AA579	-	rep_cluster_1778			MOBQ	KT693145	0.0083078	mobilizable
102	ECF41	48866	AC662	-		MOBP	MPF_I	MOBP	CP019691	0.0125405	conjugative
107	ECF41	1663	AB685	-	Col(MG828)			MOBP, MOB_unknown	CP023858	0.00141786	mobilizable
108	ECF42	59803	AA372	-	IncI2	MOBP	MPF_T	-	CP007134	0.00628226	conjugative
109	ECF42	111207	AA474	3	IncI-gamma/K1	MOBP	MPF_I	MOBP	KM377238	0.00492718	conjugative
110	ECF42	96312	AA175	-	IncFIA, IncFIB	MOBF	MPF_F	MOBF	CP011916	0.00570819	conjugative
111	ECF43	195757	AA176	-	IncFIA, IncFIB, IncFIC, rep_cluster_2244	MOBF, MOBP	MPF_F	MOBF	CP031107	0.0010072	conjugative
112	ECF43	88069	AA474	-	IncI-gamma/K1	MOBP	MPF_I	MOBP	HE654725	0.00316966	conjugative
113	ECF43	5574	AA979	-	Col156	MOBQ		-	NC_016840	0.0227838	mobilizable
114	ECF43	4704	AA162	-	rep_cluster_2350	MOBP		MOBP	CP011433	0.000483446	mobilizable
115	ECF44	165918	AA474	4	IncI-gamma/K1	MOBP	MPF_I	MOBP	CP012929	0.0158882	conjugative
116	ECF44	41357	AA315	-	IncFIA	MOBF	MPF_F	-	CP033634	0.0439391	conjugative
117	ECF44	12666	AA577	-	Col156, rep_cluster_1778, rep_cluster_2131	MOBQ		MOBQ	NC_023325	0.0396325	mobilizable
119	ECF44	9708	AB440	-	rep_cluster_2350	MOBP		MOBP	CP016009	0.0250805	mobilizable
122	ECF44	2206	AB241	-	ColpVC			MOBP	CP011842	0.00131423	mobilizable
124	ECF44	1659	AB685	-	Col(MG828)			MOBP, MOB_unknown	CP023858	0.00144387	mobilizable
125	ECF45	64997	AA372	2	IncI2	MOBP	MPF_T	-	KY565557	0.00669844	conjugative
127	ECF45	109522	AA281	2	IncK2/Z	MOBP	MPF_I	MOBP	KR905384	0.0241368	conjugative
128	ECF45	100292	AA315	-	IncFIA, IncFIC	MOBF	MPF_F	MOBF	CP033634	0.0317837	conjugative
130	ECF45	9130	AC510	-	rep_cluster_2350	MOBP		MOBP	CP032881	0.0024636	mobilizable
133	ECF45	12380	AA577	-	rep_cluster_2131, rep_cluster_2150			MOBQ	NC_023325	0.0170111	mobilizable
134	ECF45	5709	AA579	-	rep_cluster_1778	MOBQ		MOBQ	KT693145	0.0460045	mobilizable
135	ECF45	3484	AA163	-		MOBP		MOBP	CP001119	0.000167546	mobilizable
136	ECF45	2095	AB238	-	ColpVC			MOBP	AY178821	0.00302611	mobilizable
137	ECF46	175324	AA859	2	IncC	MOBH	MPF_F	MOBH	CP031362	0.0031121	conjugative
138	ECF46	89726	AA474	1	IncI-gamma/K1, IncN	MOBP	MPF_I	MOBP	AP017892	0.00495906	conjugative
139	ECF46	162613	AA178	-	IncFIB, IncFIC, rep_cluster_2244, rep_cluster_2313	MOBF	MPF_F	MOBF	CP043952	0.00505504	conjugative
140	ECF46	52251	AA327	-	IncFIA, IncFII	MOBF	MPF_F	MOBP	MK778454	0.0118471	conjugative
141	ECF46	3237	AA674	-	rep_cluster_2350, rep_cluster_2358	MOBF		MOB_unknown	CP019897	0.0107836	mobilizable
142	ECF46	2757	AD480	-	rep_cluster_2358, rep_cluster_2373			MOB_unknown	CP042592	0.0286795	mobilizable
143	ECF46	2357	AB241	-	ColpVC			MOBP	CP016574	0.0011089	mobilizable
144	ECF46	1317	AB685	-	Col(MG828)			MOB_unknown	CP024465	0.00511931	mobilizable
145	ECF47	123560	AA474	7	IncI-gamma/K1	MOBP	MPF_I	MOBP	CP012929	0.00846101	conjugative
146	ECF47	106737	AA176	-	IncFIA, IncFIC, IncFIB	MOBF, MOBP	MPF_F	MOBF	CP000836	0.00461146	conjugative
147	ECF48	64579	AA372	2	IncI2	MOBP	MPF_T	-	KY565557	0.00655869	conjugative
149	ECF48	56032	AA315	-	IncFIA	MOBF	MPF_F	MOBF	CP033634	0.0215695	conjugative
150	ECF48	112432	AA281	2	IncK2/Z	MOBP	MPF_I	MOBP	KR905384	0.0238299	conjugative
152	ECF48	9126	AC510	-	rep_cluster_2350	MOBP		MOBP	CP032881	0.00243596	mobilizable
155	ECF48	12380	AA577	-	rep_cluster_2131, rep_cluster_2150			MOBQ	NC_023325	0.0170111	mobilizable
156	ECF48	5709	AA579	-	rep_cluster_1778	MOBQ		MOBQ	KT693145	0.0460045	mobilizable
157	ECF48	3484	AA163	-		MOBP		MOBP	CP001119	0.000167546	mobilizable
158	ECF48	2095	AB238	-	ColpVC			MOBP	AY178821	0.00302611	mobilizable
159	ECF49	196327	AA178	1	IncFIB, IncFIC, rep_cluster_2244, rep_cluster_2313	MOBF	MPF_F	MOBF	CP043952	0.00224371	conjugative
160	ECF49	104508	AA859	1		MOBH	MPF_F	-	CP016864	0.0107836	conjugative
161	ECF49	116914	AA474	5	IncI-gamma/K1	MOBP	MPF_I	MOBP	CP012929	0.00701675	conjugative
162	ECF49	42072	AB233	1	IncX1, IncX3	MOBP	MPF_T	MOBP	MH121702	0.00357808	conjugative
163	ECF49	3482	AA163	-		MOBP		MOBP	CP013225	9.55247e-05	mobilizable
165	ECF50	127705	AA281	6	IncK2/Z	MOBP	MPF_I	MOBP	CP033633	0.0329357	conjugative
166	ECF50	11879	AC510	1	rep_cluster_2335, rep_cluster_2350	MOBP		MOBP	CP032881	0.0084995	mobilizable
167	ECF50	6889	AA577	-	rep_cluster_2131	MOBQ		MOBQ	FJ985252	0.00448671	mobilizable
168	ECF51	69176	AA372	1	IncI2	MOBP	MPF_T	-	KY471315	0.00811798	conjugative
169	ECF51	60752	AA316	-	IncFIA, IncFIC	MOBF	MPF_F	-	CP041111	0.0244475	conjugative
172	ECF51	6758	AC509	-	rep_cluster_2350	MOBP		MOBP	CP016513	0.000656154	mobilizable
173	ECF51	2369	AB240	-	ColpVC			MOBP	CP016582	0.0250005	mobilizable
174	ECF51	1663	AB685	-	Col(MG828)			MOBP, MOB_unknown	CP023858	0.000264084	mobilizable
176	ECF52	179173	AA859	2	IncC	MOBH	MPF_F	MOBH	CP031362	0.00277069	conjugative
177	ECF52	75124	AA474	-	IncI-gamma/K1	MOBP	MPF_I	MOBP	AP017892	0.00495906	conjugative
178	ECF52	121303	AA178	-	IncFIB, IncFIC, rep_cluster_2244, rep_cluster_2313	MOBF	MPF_F	MOBF	CP023384	0.0121679	conjugative
179	ECF52	74816	AA327	2	IncFIA, IncFII, IncN	MOBF, MOBQ	MPF_F	MOBP	CP035314	0.004991	conjugative
180	ECF52	20644	AB233	-	IncX1, IncX3			MOBP	DQ115387	0.0492808	mobilizable
183	ECF53	113136	AA474	4	IncI-gamma/K1	MOBP	MPF_I	MOBP	CP012929	0.00600989	conjugative
184	ECF53	120654	AA175	5	IncFIB, IncFIC, rep_cluster_2244	MOBF	MPF_F	MOBF	NC_025139	0.00723198	conjugative
185	ECF53	5681	AB443	-	rep_cluster_2350	MOBP		MOBP	CP035351	0.000336872	mobilizable
187	ECF54	117099	AA474	1	IncI-gamma/K1	MOBP	MPF_I	MOBP	CP016520	0.0132087	conjugative
188	ECF54	56872	AA329	-	IncFIA	MOBF	MPF_F	MOBF	NC_013362	0.0244475	conjugative
189	ECF54	100375	AA281	-	IncK2/Z	MOBP	MPF_I	MOBP	CP033633	0.0147665	conjugative
191	ECF54	29253	AD451	1		MOBC	MPF_T	-	CP037908	0.0266484	conjugative
195	ECF55	114702	AA175	-	IncFIA, IncFIC, IncFIB	MOBF	MPF_F	MOBF	NC_025139	0.0151872	conjugative
197	ECF55	4826	AD485	-	rep_cluster_2350			MOBF, MOBP, MOB_unknown	LN824137	0.00139189	mobilizable
